# Supplementary material for: Chemical synthesis of natural and azido-modified UDP-rhamnose and -arabinofuranose for glycan array-based characterization of plant glycosyltransferases
Source: Royal Society of Chemistry journal article supplement (doi:10.1039/d4cc02095b), 2024-01-01
Supplement: d4cc02095b2.xlsx [file d4cc02095b2.xlsx]

## Sheet: AtRRT4 and PtRRT5
			AtRRT4						AtRRT4 negative control (no UDP-RhaN3)						PtRRT5						PtRRT5 negative control (no UDP-RhaN3)
Compound number	WURC2 string	GlyTouCan accesion number	1.rep	2.rep	3.rep	average	SD		1.rep	2.rep	3.rep	average	SD		1.rep	2.rep	3.rep	average	SD		1.rep	2.rep	3.rep	average	SD
xylans
1	WURCS=2.0/1,2,1/[a212h-1b_1-5]/1-1/a4-b1	G87728WL	141	149	95	128.333	29.1433		161	213	209	194.333	28.9367		78	129	191	132.667	56.5892		252	188	193	211	35.5949
2	WURCS=2.0/1,4,3/[a212h-1b_1-5]/1-1-1-1/a4-b1_b4-c1_c4-d1	G60650FG	109	341	114	188	132.525		129	361	234	241.333	116.174		98	110	159	122.333	32.3161		208	201	265	224.667	35.1046
3	WURCS=2.0/1,6,5/[a212h-1b_1-5]/1-1-1-1-1-1/a4-b1_b4-c1_c4-d1_d4-e1_e4-f1	G71882IJ	152	196	126	158	35.3836		215	200	136	183.667	41.9563		131	137	108	125.333	15.308		176	112	240	176	64
4	WURCS=2.0/1,8,7/[a212h-1b_1-5]/1-1-1-1-1-1-1-1/a4-b1_b4-c1_c4-d1_d4-e1_e4-f1_f4-g1_g4-h1	G96903UA	253	135	195	194.333	59.0028		160	175	286	207	68.8259		144	144	136	141.333	4.6188		138	200	192	176.667	33.7244
5	WURCS=2.0/2,4,3/[a212h-1b_1-5][a211h-1a_1-5]/1-1-2-1/a4-b1_b3-c1_b4-d1	G64102ZU	127	100	106	111	14.1774		71	190	206	155.667	73.7586		141	174	127	147.333	24.1316		221	239	413	291	106.038
6	WURCS=2.0/2,7,6/[a212h-1b_1-5][a211h-1a_1-5]/1-1-1-1-2-1-1/a4-b1_b4-c1_c4-d1_d3-e1_d4-f1_f4-g1	G23128IK	245	149	367	253.667	109.258		212	207	225	214.667	9.29157		131	135	115	127	10.583		252	184	410	282	115.948
7	WURCS=2.0/2,7,6/[a212h-1b_1-5][a211h-1a_1-5]/1-1-2-1-2-1-1/a4-b1_b3-c1_b4-d1_d3-e1_d4-f1_f4-g1	G14837AV	278	198	158	211.333	61.101		157	132	180	156.333	24.0069		103	228	107	146	71.0422		246	313	211	256.667	51.8298
8	WURCS=2.0/2,7,6/[a212h-1b_1-5][a211h-1a_1-5]/1-1-2-1-1-2-1/a4-b1_b3-c1_b4-d1_d4-e1_e3-f1_e4-g1	G69043BW	187	124	283	198	80.0687		210	149	250	203	50.8626		142	183	124	149.667	30.2379		152	201	192	181.667	26.0832
9	WURCS=2.0/2,8,7/[a212h-1b_1-5][a211h-1a_1-5]/1-1-2-1-1-1-2-1/a4-b1_b3-c1_b4-d1_d4-e1_e4-f1_f3-g1_f4-h1	G89775EO	236	236	275	249	22.5167		316	264	300	293.333	26.6333		203	209	182	198	14.1774		326	229	274	276.333	48.5421
10	WURCS=2.0/2,4,3/[a212h-1b_1-5][a211h-1a_1-5]/1-1-1-2/a4-b1_b4-c1_c3-d1	G53464RS	175	270	161	202	59.3043		275	227	136	212.667	70.5998		130	178	136	148	26.1534		315	269	237	273.667	39.2088
11	WURCS=2.0/2,4,3/[a212h-1b_1-5][a211h-1a_1-5]/1-1-2-1/a4-b1_b2-c1_b4-d1	G10091JX	173	139	170	160.667	18.8237		250	181	288	239.667	54.2433		151	192	96	146.333	48.1698		201	427	263	297	116.773
12	WURCS=2.0/2,7,6/[a212h-1b_1-5][a211h-1a_1-5]/1-1-1-1-2-1-1/a4-b1_b4-c1_c4-d1_d2-e1_d4-f1_f4-g1	G50830OS	183	170	209	187.333	19.8578		180	233	323	245.333	72.2934		203	149	147	166.333	31.77		348	185	285	272.667	82.1969
13	WURCS=2.0/2,4,3/[a212h-1b_1-5][a211h-1a_1-5]/1-1-1-2/a4-b1_b4-c1_c2-d1	G52210UI	237	157	162	185.333	44.8144		175	156	236	189	41.7971		136	148	123	135.667	12.5033		269	154	285	236	71.4633
14	WURCS=2.0/2,7,6/[a212h-1b_1-5][a211h-1a_1-5]/1-1-1-1-1-1-2/a4-b1_b4-c1_c4-d1_d4-e1_e4-f1_f2-g1	G81390TN	161	105	280	182	89.37		184	217	197	199.333	16.6233		191	159	200	183.333	21.5484		227	121	226	191.333	60.9125
15	WURCS=2.0/1,7,6/[a212h-1b_1-5]/1-1-1-1-1-1-1/a4-b1_b4-c1_c4-d1_d2-e1_d4-f1_f4-g1	G71309QR	96	166	127	129.667	35.0761		264	166	201	210.333	49.6622		124	117	157	132.667	21.362		243	224	264	243.667	20.0083
16	WURCS=2.0/2,5,4/[a212h-1b_1-5][a211h-1a_1-5]/1-1-2-1-1/a4-b1_b3-c1_b4-e1_c2-d1	G22073WG	125	120	63	102.667	34.4432		287	212	293	264	45.1331		119	137	137	131	10.3923		204	180	247	210.333	33.946
17	WURCS=2.0/2,6,5/[a212h-1b_1-5][a211h-1a_1-5]/1-1-1-2-1-1/a4-b1_b4-c1_c3-d1_c4-f1_d2-e1	G15751DP	169	178	90	145.667	48.4183		280	229	280	263	29.4449		129	115	145	129.667	15.0111		385	219	281	295	83.8809
18	WURCS=2.0/2,5,4/[a212h-1b_1-5][a211h-1a_1-5]/1-1-2-2-1/a4-b1_b2-c1_b3-d1_b4-e1	G48347ID	168	217	134	173	41.7253		304	223	324	283.667	53.4821		99	130	113	114	15.5242		418	330	289	345.667	65.9116
19	WURCS=2.0/2,8,7/[a212h-1b_1-5][a211h-1a_1-5]/1-1-1-2-2-1-2-2/a4-b1_b4-c1_c3-d1_c4-f1_d3-e1_f4-g1_g3-h1	G30104OZ	306	267	227	266.667	39.5011		343	181	277	267	81.4616		158	157	179	164.667	12.4231		268	247	362	292.333	61.24
20	WURCS=2.0/2,4,3/[a212h-1b_1-5][a2122A-1a_1-5_4*OC]/1-1-2-1/a4-b1_b2-c1_b4-d1	G14569KK	750	828	827	801.667	44.7474		810	712	775	765.667	49.6622		334	316	217	289	63		924	696	894	838	123.887
21	WURCS=2.0/2,4,3/[a212h-1b_1-5][a2122A-1a_1-5]/1-1-2-1/a4-b1_b2-c1_b4-d1	G17988WV	143	310	81	178	118.444		206	229	193	209.333	18.23		97	57	70	74.6667	20.4042		216	260	293	256.333	38.6307
22	WURCS=2.0/2,4,3/[a212h-1b_1-5][a2122h-1a_1-5]/1-1-2-1/a4-b1_b2-c1_b4-d1	G35558WI	139	148	119	135.333	14.8436		267	354	261	294	52.0481		159	103	77	113	41.9047		407	220	284	303.667	95.0386
			45	51	126	74	45.1331		169	173	127	156.333	25.482		113	66	84	87.6667	23.7136		272	176	206	218	49.1121
			36	122	115	91	47.7598		255	319	166	246.667	76.8397		92	103	77	90.6667	13.0512		285	167	387	279.667	110.097
Glucans
23	WURCS=2.0/1,3,2/[a2122h-1b_1-5]/1-1-1/a4-b1_b4-c1	G14338VK	110	222	229	187	66.7757		328	313	466	369	84.3386		56	181	140	125.667	63.7207		159	174	209	180.667	25.658
24	WURCS=2.0/1,4,3/[a2122h-1b_1-5]/1-1-1-1/a4-b1_b4-c1_c4-d1	G00025MO	113	141	415	223	166.865		242	277	242	253.667	20.2073		144	137	106	129	20.2237		243	192	297	244	52.5071
25	WURCS=2.0/1,5,4/[a2122h-1b_1-5]/1-1-1-1-1/a4-b1_b4-c1_c4-d1_d4-e1	G91683DU	218	249	164	210.333	43.0155		250	281	311	280.667	30.5014		134	141	139	138	3.60555		328	295	167	263.333	85.0431
26	WURCS=2.0/2,4,3/[a2122h-1b_1-5][a212h-1a_1-5]/1-1-1-2/a4-b1_b4-c1_b6-d1	G40879YH	3	287	143	144.333	142.005		212	406	396	338	109.234		98	120	75	97.6667	22.5019		247	277	174	232.667	52.9748
27	WURCS=2.0/2,5,4/[a2122h-1b_1-5][a212h-1a_1-5]/1-1-1-1-2/a4-b1_b4-c1_c4-d1_d6-e1	G45544RX	215	58	66	113	88.4251		323	332	190	281.667	79.5131		228	114	159	167	57.4195		247	247	293	262.333	26.5581
28	WURCS=2.0/2,5,4/[a2122h-1b_1-5][a212h-1a_1-5]/1-1-1-1-2/a4-b1_b4-c1_c4-d1_c6-e1	G86130MI	241	369	129	246.333	120.089		307	226	208	247	52.7352		97	96	95	96	1		334	325	263	307.333	38.6566
29	WURCS=2.0/2,5,4/[a2122h-1b_1-5][a212h-1a_1-5]/1-1-1-1-2/a4-b1_b4-c1_b6-e1_c4-d1	G28151PW	99	133	169	133.667	35.0048		240	240	232	237.333	4.6188		138	107	180	141.667	36.6379		253	379	234	288.667	78.8057
30	WURCS=2.0/2,6,5/[a2122h-1b_1-5][a212h-1a_1-5]/1-1-1-1-2-2/a4-b1_b4-c1_c4-d1_c6-f1_d6-e1	G01300FE	153	26	179	119.333	81.8678		276	399	321	332	62.2334		89	63	90	80.6667	15.308		312	412	292	338.667	64.291
31	WURCS=2.0/2,6,5/[a2122h-1b_1-5][a212h-1a_1-5]/1-1-1-1-2-2/a4-b1_b4-c1_b6-f1_c4-d1_c6-e1	G71553LX	294	could not be analyzed	167	230.5	147.453		275	263	261	266.333	7.57188		102	138	135	125	19.975		229	171	254	218	42.5793
32	WURCS=2.0/2,7,6/[a2122h-1b_1-5][a212h-1a_1-5]/1-1-1-1-1-2-2/a4-b1_b4-c1_b6-g1_c4-d1_d4-e1_d6-f1	G73210DI	216	121	137	158	50.8626		244	273	333	283.333	45.3909		113	137	134	128	13.0767		168	180	248	198.667	43.1432
33	WURCS=2.0/2,8,7/[a2122h-1b_1-5][a212h-1a_1-5]/1-1-1-1-1-2-2-2/a4-b1_b4-c1_b6-h1_c4-d1_c6-g1_d4-e1_d6-f1	G36639LT	141	116	248	168.333	70.1166		273	290	284	282.333	8.62168		98	107	116	107	9		168	209	92	156.333	59.3661
34	WURCS=2.0/2,7,6/[a2122h-1b_1-5][a212h-1a_1-5]/1-1-1-1-1-1-2/a4-b1_b4-c1_c4-d1_d4-e1_e4-f1_f6-g1	G52809MO	94	144	270	169.333	90.6936		341	222	333	298.667	66.5157		92	162	511	255	224.448		133	97	152	127.333	27.9344
35	WURCS=2.0/3,6,5/[a2122h-1b_1-5][a212h-1a_1-5][a2112h-1b_1-5]/1-1-1-1-2-3/a4-b1_b4-c1_c4-d1_d6-e1_e2-f1	G30237ZO	167	273	132	190.667	73.4189		361	191	383	311.667	105.078		161	131	104	132	28.5132		185	183	226	198	24.2693
36	WURCS=2.0/3,6,5/[a2122h-1b_1-5][a212h-1a_1-5][a2112h-1b_1-5]/1-1-1-1-2-3/a4-b1_b4-c1_c4-d1_c6-e1_e2-f1	G19836SS	101	203	83	129	64.7148		327	224	418	323	97.0618		118	91	183	130.667	47.2899		200	319	155	224.667	84.7368
37	WURCS=2.0/1,3,2/[a2122h-1b_1-5]/1-1-1/a4-b1_b3-c1	G09035TO	137	100	109	115.333	19.2959		284	301	373	319.333	47.2476		113	83	123	106.333	20.8167		221	228	237	228.667	8.02081
38	WURCS=2.0/1,4,3/[a2122h-1b_1-5]/1-1-1-1/a4-b1_b3-c1_c4-d1	G75242TK	120	476	190	262	188.605		293	238	290	273.667	30.9246		176	171	156	167.667	10.4083		259	204	235	232.667	27.5741
39	WURCS=2.0/1,6,5/[a2122h-1b_1-5]/1-1-1-1-1-1/a3-b1_b4-c1_c4-d1_d4-e1_e3-f1	G57672GN	186	309	114	203	98.6053		245	239	174	219.333	39.3743		169	76	119	121.333	46.5439		149	152	116	139	19.975
40	WURCS=2.0/1,6,5/[a2122h-1b_1-5]/1-1-1-1-1-1/a4-b1_b4-c1_c3-d1_d3-e1_e4-f1	G46573GP	159	241	129	176.333	57.977		223	228	282	244.333	32.7159		188	103	349	213.333	124.941		226	266	171	221	47.697
41	WURCS=2.0/1,6,5/[a2122h-1b_1-5]/1-1-1-1-1-1/a4-b1_b3-c1_c4-d1_d4-e1_e4-f1	G99723FZ	127	469	464	353.333	196.026		214	238	236	229.333	13.3167		131	103	121	118.333	14.1892		252	215	277	248	31.1929
42	WURCS=2.0/1,6,5/[a2122h-1b_1-5]/1-1-1-1-1-1/a3-b1_b4-c1_c3-d1_d4-e1_e4-f1	G59491WV	198	148	166	170.667	25.3246		328	246	275	283	41.5812		179	310	303	264	73.6953		255	321	218	264.667	52.176
43	WURCS=2.0/1,8,7/[a2122h-1b_1-5]/1-1-1-1-1-1-1-1/a3-b1_b4-c1_c4-d1_d3-e1_e4-f1_f3-g1_g4-h1	G33033DC	190	203	179	190.667	12.0139		386	392	317	365	41.6773		93	153	107	117.667	31.39		174	236	168	192.667	37.6475
44	WURCS=2.0/1,5,4/[a2122h-1b_1-5]/1-1-1-1-1/a3-b1_b3-c1_b6-e1_c3-d1	G19376WE	205	198	189	197.333	8.02081		540	461	479	493.333	41.4045		173	187	97	152.333	48.4286		385	527	320	410.667	105.86
45	WURCS=2.0/1,6,5/[a2122h-1b_1-5]/1-1-1-1-1-1/a6-b1_b6-c1_c6-d1_d6-e1_e6-f1	G98667GG	140	104	155	133	26.2107		308	150	270	242.667	82.4702		129	92	83	101.333	24.379		337	109	164	203.333	118.98
46	WURCS=2.0/1,13,12/[a2122h-1b_1-5]/1-1-1-1-1-1-1-1-1-1-1-1-1/a3-b1_b3-c1_c3-d1_d3-e1_e3-f1_f3-g1_g3-h1_h3-i1_i3-j1_j3-k1_j6-m1_k3-l1	G24657BS	193	111	154	152.667	41.0163		376	392	360	376	16		204	272	173	216.333	50.6392		230	311	348	296.333	60.3517
Galactans
47	WURCS=2.0/1,2,1/[a2112h-1b_1-5]/1-1/a4-b1	G08806VI	138	224	138	166.667	49.6521		216	244	249	236.333	17.7858		108	166	147	140.333	29.5691		325	376	539	413.333	111.778
48	WURCS=2.0/1,4,3/[a2112h-1b_1-5]/1-1-1-1/a4-b1_b4-c1_c4-d1	G62513AX	170	374	134	226	129.43		210	183	290	227.667	55.6447		87	81	160	109.333	43.9811		280	359	274	304.333	47.4377
49	WURCS=2.0/1,6,5/[a2112h-1b_1-5]/1-1-1-1-1-1/a4-b1_b4-c1_c4-d1_d4-e1_e4-f1	G22123IT	164	172	278	204.667	63.6344		85	153	214	150.667	64.5316		130	160	87	125.667	36.6924		243	358	468	356.333	112.509
50	WURCS=2.0/1,4,3/[a2112h-1b_1-5]/1-1-1-1/a4-b1_b3-c1_c4-d1	G71535YZ	137	138	224	166.333	49.9433		275	345	263	294.333	44.2869		112	212	172	165.333	50.3322		360	328	312	333.333	24.4404
51	WURCS=2.0/2,4,3/[a2112h-1b_1-5][a211h-1a_1-5]/1-1-2-1/a4-b1_b3-c1_b4-d1	G49633QF	153	339	220	237.333	94.2037		217	194	359	256.667	89.3663		136	173	70	126.333	52.176		256	243	578	359	189.771
52	WURCS=2.0/2,5,4/[a2112h-1b_1-5][a211h-1a_1-5]/1-1-1-1-2/a4-b1_b4-c1_c4-d1_d3-e1	G60984JT	117	238	199	184.667	61.7603		229	200	274	234.333	37.2872		140	219	144	167.667	44.5009		599	561	228	462.667	204.114
53	WURCS=2.0/2,5,4/[a2112h-1b_1-5][a211h-1a_1-5]/1-1-2-2-1/a4-b1_b3-c1_b4-e1_c3-d1	G35813VQ	180	179	181	180	1		340	337	272	316.333	38.4231		95	210	168	157.667	58.1922		332	359	252	314.333	55.6447
54	WURCS=2.0/2,3,2/[a2112h-1b_1-5][a211h-1a_1-5]/1-2-2/a3-b1_b3-c1	G99405KI	189	195	235	206.333	25.0067		252	254	233	246.333	11.5902		190	81	130	133.667	54.5924		447	225	359	343.667	111.791
55	WURCS=2.0/2,4,3/[a2112h-1b_1-5][a211h-1a_1-5]/1-2-2-2/a3-b1_b5-c1_c5-d1		232	164	101	165.667	65.5159		253	314	375	314	61		197	170	179	182	13.7477		283	180	566	343	199.872
56	WURCS=2.0/1,3,2/[a2112h-1b_1-5]/1-1-1/a3-b1_b3-c1	G59103JC	129	158	169	152	20.664		279	234	386	299.667	78.079		136	188	165	163	26.0576		543	357	460	453.333	93.179
57	WURCS=2.0/1,4,3/[a2112h-1b_1-5]/1-1-1-1/a3-b1_b3-c1_c3-d1	G29848AT	81	196	157	144.667	58.4836		296	238	319	284.333	41.7413		104	188	122	138	44.2267		263	566	246	358.333	180.045
58	WURCS=2.0/1,3,2/[a2112h-1b_1-5]/1-1-1/a6-b1_b6-c1	G29570QA	114	113	82	103	18.1934		323	297	244	288	40.2616		110	106	89	101.667	11.1505		366	293	437	365.333	72.0023
59	WURCS=2.0/1,4,3/[a2112h-1b_1-5]/1-1-1-1/a3-b1_b3-c1_b6-d1	G47779ZP	140	68	94	100.667	36.46		232	246	171	216.333	39.879		185	134	377	232	128.137		461	389	217	355.667	125.369
60	WURCS=2.0/1,5,4/[a2112h-1b_1-5]/1-1-1-1-1/a3-b1_b3-c1_b6-d1_d6-e1	G91585CB	96	134	81	103.667	27.3191		171	184	290	215	65.2763		158	120	158	145.333	21.9393		285	309	915	503	357.004
61	WURCS=2.0/1,6,5/[a2112h-1b_1-5]/1-1-1-1-1-1/a3-b1_b3-c1_b6-e1_c3-d1_e6-f1	G37513LU	132	92	126	116.667	21.5716		174	209	259	214	42.72		100	278	116	164.667	98.475		309	272	282	287.667	19.1398
62	WURCS=2.0/1,6,5/[a2112h-1b_1-5]/1-1-1-1-1-1/a3-b1_b3-c1_b6-d1_d6-e1_e6-f1	G34130PB	135	115	137	129	12.1655		207	154	124	161.667	42.0278		209	87	194	163.333	66.5307		433	189	318	313.333	122.067
63	WURCS=2.0/2,4,3/[a2112h-1b_1-5][a211h-1a_1-5]/1-1-1-2/a3-b1_b3-c1_c3-d1	G92483ZF	264	120	181	188.333	72.2795		149	255	163	189	57.5847		166	174	128	156	24.5764		490	441	215	382	146.687
64	WURCS=2.0/2,4,3/[a2112h-1b_1-5][a211h-1a_1-5]/1-1-1-2/a3-b1_b3-c1_b6-d1	G53565YZ	117	127	94	112.667	16.9214		205	215	308	242.667	56.8008		93	122	121	112	16.4621		341	354	254	316.333	54.3722
65	WURCS=2.0/2,4,3/[a2112h-1b_1-5][a211h-1a_1-5]/1-1-2-1/a6-b1_b3-c1_b6-d1	G11128FL	124	116	89	109.667	18.3394		246	330	352	309.333	55.9404		111	105	149	121.667	23.8607		330	236	268	278	47.7912
66	WURCS=2.0/2,4,3/[a2112h-1b_1-5][a211h-1a_1-5]/1-1-2-1/a3-b1_b3-c1_b6-d1	G01808NH	97	45	201	114.333	79.4313		201	232	244	225.667	22.1886		160	90	124	124.667	35.0048		344	210	319	291	71.2531
67	WURCS=2.0/2,5,4/[a2112h-1b_1-5][a211h-1a_1-5]/1-1-1-1-2/a3-b1_b3-c1_b6-d1_d3-e1	G83478SX	150	110	205	155	47.697		233	178	219	210	28.5832		176	98	149	141	39.6106		324	241	222	262.333	54.2433
68	WURCS=2.0/2,6,5/[a2112h-1b_1-5][a211h-1a_1-5]/1-1-1-1-2-1/a3-b1_b3-c1_b6-d1_d3-e1_d6-f1	G19411SY	136	126	170	144	23.0651		190	179	172	180.333	9.07377		166	106	123	131.667	30.9246		253	546	298	365.667	157.786
69	WURCS=2.0/2,7,6/[a2112h-1b_1-5][a211h-1a_1-5]/1-1-1-1-1-2-1/a3-b1_b3-c1_b6-d1_d6-e1_e3-f1_e6-g1	G32677AA	141	182	125	149.333	29.3995		229	254	147	210	55.9732		196	135	148	159.667	32.1299		229	259	247	245	15.0997
70	WURCS=2.0/2,4,3/[a2112h-1b_1-5][a211h-1a_1-5]/1-1-1-2/a6-b1_b6-c1_c3-d1	G06559MU	81	80	39	66.6667	23.9653		174	262	267	234.333	52.31		136	167	120	141	23.8956		258	180	193	210.333	41.7892
71	WURCS=2.0/2,6,5/[a2112h-1b_1-5][a211h-1a_1-5]/1-1-1-1-1-2/a6-b1_b6-c1_c6-d1_d6-e1_e3-f1	G53028ID	61	123	184	122.667	61.5007		250	296	241	262.333	29.5014		151	155	74	126.667	45.6545		302	238	274	271.333	32.0832
72	WURCS=2.0/1,3,2/[a2112h-1b_1-5]/1-1-1/a4-b1_b4-c1	G06996VN	308	442	289	346.333	83.3926		260	213	232	235	23.6432		514	860	790	721.333	182.935		702	689	623	671.333	42.3596
73	WURCS=2.0/1,4,3/[a2112h-1b_1-5]/1-1-1-1/a4-b1_b4-c1_c4-d1	G62513AX	406	503	439	449.333	49.3187		277	343	374	331.333	49.5412		586	841	984	803.667	201.609		588	651	607	615.333	32.3161
74	WURCS=2.0/1,5,4/[a2112h-1b_1-5]/1-1-1-1-1/a4-b1_b4-c1_c4-d1_d4-e1	G05744VA	442	450	367	419.667	45.7857		283	284	303	290	11.2694		753	1491	1562	1268.67	447.989		559	605	714	626	79.6053
75	WURCS=2.0/1,6,5/[a2112h-1b_1-5]/1-1-1-1-1-1/a4-b1_b4-c1_c4-d1_d4-e1_e4-f1	G22123IT	418	322	379	373	48.2804		274	229	461	321.333	123.03		716	1022	1730	1156	520.112		660	714	645	673	36.2905
76	WURCS=2.0/1,7,6/[a2112h-1b_1-5]/1-1-1-1-1-1-1/a4-b1_b4-c1_c4-d1_d4-e1_e4-f1_f4-g1	G05136IV	500	431	444	458.333	36.6652		238	260	303	267	33.0606		763	1190	1657	1203.33	447.149		608	767	890	755	141.382
77	WURCS=2.0/1,7,6/[a2112h-1b_1-5]/1-1-1-1-1-1-1/a4-b1_b4-c1_c4-d1_d4-e1_d6-g1_e4-f1	G41546BT	296	309	272	292.333	18.7705		231	204	341	258.667	72.5695		690	488	389	522.333	153.409		735	689	564	662.667	88.4892
78	WURCS=2.0/1,8,7/[a2112h-1b_1-5]/1-1-1-1-1-1-1-1/a4-b1_b4-c1_c4-d1_d4-e1_d6-g1_e4-f1_g6-h1	G04227VO	316	335	489	380	94.8736		280	358	351	329.667	43.1548		778	861	747	795.333	58.9435		547	709	735	663.667	101.869
79	WURCS=2.0/1,8,7/[a2112h-1b_1-5]/1-1-1-1-1-1-1-1/a4-b1_b4-c1_c4-d1_d4-e1_d6-g1_e4-f1_g4-h1	G37217ZU	302	312	457	357	86.7468		278	282	325	295	26.0576		702	561	685	649.333	76.9697		691	714	862	755.667	92.8027
80	WURCS=2.0/2,7,6/[a2112h-1b_1-5][a211h-1a_1-5]/1-1-1-1-1-1-2/a4-b1_b4-c1_c4-d1_d4-e1_d6-g1_e4-f1	G53308JF	318	414	416	382.667	56.0119		280	254	354	296	51.8845		734	639	678	683.667	47.7528		724	709	826	753	63.6632
81	WURCS=2.0/2,8,7/[a2112h-1b_1-5][a211h-1a_1-5]/1-1-1-1-1-1-2-2/a4-b1_b4-c1_c4-d1_d4-e1_d6-g1_e4-f1_g5-h1		582	484	384	483.333	99.0017		296	327	328	317	18.1934		781	813	618	737.333	104.577		724	685	693	700.667	20.5994
82	WURCS=2.0/2,7,6/[a2112h-1b_1-5][a211h-1a_1-5]/1-1-1-1-1-1-2/a4-b1_b4-c1_c4-d1_d4-e1_e4-f1_f4-g1	G20750EO	400	405	507	437.333	60.3849		352	524	465	447	87.4014		500	674	576	583.333	87.2315		621	661	618	633.333	24.0069
83	WURCS=2.0/2,4,3/[a2112h-1b_1-5][a2122h-1b_1-5]/1-1-1-2/a4-b1_b4-c1_c4-d1	G28285NI	340	221	277	279.333	59.5343		260	271	265	265.333	5.50757		423	539	328	430	105.674		427	575	357	453	111.301
84	WURCS=2.0/2,4,3/[a2112h-1b_1-5][a2112h-1b_1-5_4*OC]/1-1-1-2/a4-b1_b4-c1_c4-d1	G18996NP	365	378	311	351.333	35.5293		390	311	372	357.667	41.4045		504	628	527	553	65.9621		639	592	616	615.667	23.5018
85	WURCS=2.0/2,4,3/[a2112h-1b_1-5][a2112h-1b_1-5_4*F]/1-1-1-2/a4-b1_b4-c1_c4-d1	G58945FW	377	303	397	359	49.5177		331	324	255	303.333	42.004		577	673	540	596.667	68.6464		630	848	820	766	118.609
86	WURCS=2.0/1,5,4/[a2112h-1b_1-5]/1-1-1-1-1/a3-b1_b3-c1_c3-d1_d3-e1	G53909FV	195	404	245	281.333	109.134		297	329	367	331	35.0428		321	297	355	324.333	29.1433		618	486	437	513.667	93.618
87	WURCS=2.0/1,7,6/[a2112h-1b_1-5]/1-1-1-1-1-1-1/a3-b1_b3-c1_c3-d1_d3-e1_e3-f1_f3-g1	G97340LC	291	290	418	333	73.6139		357	400	502	419.667	74.4737		369	548	477	464.667	90.1351		661	457	523	547	104.096
88	WURCS=2.0/1,4,3/[a2112h-1b_1-5]/1-1-1-1/a6-b1_b6-c1_c6-d1	G94974RN	213	228	294	245	43.0929		242	404	347	331	82.1766		326	375	393	364.667	34.6747		492	404	416	437.333	47.7214
89	WURCS=2.0/1,9,8/[a2112h-1b_1-5]/1-1-1-1-1-1-1-1-1/a3-b1_b3-c1_c3-d1_d3-e1_e3-f1_e6-h1_f3-g1_h3-i1	G28007CY	305	417	could not be analyzed	361	79.196		610	381	371	454	135.192		289	457	413	386.333	87.1168		464	491	427	460.667	32.1299
90	WURCS=2.0/1,9,8/[a2112h-1b_1-5]/1-1-1-1-1-1-1-1-1/a3-b1_b3-c1_c3-d1_d3-e1_e3-f1_e6-h1_f3-g1_h6-i1	G19954SU	340	233	334	302.333	60.1193		394	333	519	415.333	94.8174		376	380	433	396.333	31.8172		404	507	405	438.667	59.1805
91	WURCS=2.0/1,9,8/[a2112h-1b_1-5]/1-1-1-1-1-1-1-1-1/a3-b1_b3-c1_c3-d1_c6-h1_d3-e1_e3-f1_f3-g1_h3-i1	G83956ON	440	479	358	425.667	61.7603		352	423	474	416.333	61.2726		412	508	525	481.667	60.9289		579	573	544	565.333	18.7172
92	WURCS=2.0/2,8,7/[a2112h-1b_1-5][a211h-1a_1-5]/1-1-1-1-1-1-1-2/a3-b1_b3-c1_c3-d1_d3-e1_e3-f1_e6-h1_f3-g1	G46919JY	299	178	324	267	78.0833		511	439	446	465.333	39.7031		431	428	455	438	14.7986		433	489	468	463.333	28.2902
93	WURCS=2.0/2,3,2/[a2112h-1b_1-5][a2122A-1b_1-5]/1-1-2/a6-b1_b6-c1	G17518CK	352	351	370	357.667	10.6927		432	415	319	388.667	60.9289		418	473	494	461.667	39.2471		349	417	433	399.667	44.6019
94	WURCS=2.0/2,3,2/[a2112h-1b_1-5][a2122A-1b_1-5_4*OC]/1-1-2/a6-b1_b6-c1	G18283GP	273	407	466	382	98.8989		363	333	441	379	55.7494		439	357	388	394.667	41.4045		406	282	428	372	78.7147
Other
95	WURCS=2.0/2,6,5/[a2112A-1a_1-5_6*OC][a2112A-1a_1-5]/1-2-2-2-1-1/a4-b1_b4-c1_c4-d1_d4-e1_e4-f1	G87950TF	463	433	506	467.333	36.6924		261	271	388	306.667	70.614		444	750	1418	870.667	498.086		566	542	519	542.333	23.5018
96	WURCS=2.0/2,6,5/[a2112A-1a_1-5][a2112A-1a_1-5_6*OC]/1-2-2-2-1-1/a4-b1_b4-c1_c4-d1_d4-e1_e4-f1	G41087WO	283	464	601	449.333	159.507		250	224	211	228.333	19.8578		868	454	485	602.333	230.596		449	535	628	537.333	89.5228
97	WURCS=2.0/2,6,5/[a2112A-1a_1-5_6*OC][a2112A-1a_1-5]/1-2-2-2-2-1/a4-b1_b4-c1_c4-d1_d4-e1_e4-f1	G99127GZ	369	415	324	369.333	45.5009		219	310	241	256.667	47.4798		457	456	531	481.333	43.0155		595	567	628	596.667	30.5341
98	WURCS=2.0/2,6,5/[a2112A-1a_1-5][a2112A-1a_1-5_6*OC]/1-2-1-2-1-2/a4-b1_b4-c1_c4-d1_d4-e1_e4-f1	G01729NF	706	689	746	713.667	29.2632		584	575	557	572	13.7477		855	940	940	911.667	49.0748		935	857	1074	955.333	109.92
99	WURCS=2.0/2,6,5/[a2112A-1a_1-5][a2211m-1a_1-5]/1-2-1-2-1-2/a4-b1_b2-c1_c4-d1_d2-e1_e4-f1	G43211JR	1342	1305	1264	1303.67	39.0171		270	339	426	345	78.1729		2215	2130	2804	2383	367.065		384	422	408	404.667	19.218
100	WURCS=2.0/1,6,5/[a1122h-1b_1-5]/1-1-1-1-1-1/a6-b1_b6-c1_c6-d1_d6-e1_e6-f1	G43482XA	1053	1324	1457	1278	205.891		415	501	384	433.333	60.6163		584	752	717	684.333	88.636		1820	1973	2341	2044.67	267.792
101	WURCS=2.0/2,8,7/[a1122h-1b_1-5][a211h-1a_1-5]/1-1-1-1-1-1-2-2/a6-b1_b6-c1_c6-d1_d6-e1_e6-f1_f6-g1_g5-h1		464	594	516	524.667	65.4319		337	284	326	315.667	27.9702		256	255	441	317.333	107.1		693	990	1029	904	183.769
102	WURCS=2.0/1,6,5/[a1122h-1b_1-5]/1-1-1-1-1-1/a6-b1_b2-c1_c2-d1_d6-e1_e2-f1	G45716PI	794	732	487	671	162.336		308	380	348	345.333	36.074		274	269	267	270	3.60555		827	1068	1011	968.667	125.954
103	WURCS=2.0/1,6,5/[a1122h-1b_1-5]/1-1-1-1-1-1/a6-b1_b2-c1_b6-d1_d2-e1_d6-f1	G37046TM	1022	912	1061	998.333	77.2679		727	735	671	711	34.8712		576	514	678	589.333	82.809		1854	2239	1723	1938.67	268.217
104	WURCS=2.0/1,6,5/[a2122h-1b_1-5_2*NCC/3=O]/1-1-1-1-1-1/a4-b1_b4-c1_c4-d1_d4-e1_e4-f1	G36414FS	95	146	293	178	102.806		126	415	485	342	190.308		82	471	478	343.667	226.637		158	228	458	281.333	156.95

## Sheet: PvXAT3
			PvXAT3 CCRC-M154						no enzyme CCRC-M154						PvXAT3 UDP-Ara-N3
Compound number	WURC2 string	GlyTouCan accesion number	1.rep	2.rep	3.rep	average	SD		1.rep	2.rep	3.rep	average	SD		1.rep	2.rep	3.rep	average	SD
xylans
1	WURCS=2.0/1,2,1/[a212h-1b_1-5]/1-1/a4-b1	G87728WL	152	39	22	71	70.6612		4	117	-8	37.6667	68.9662		58	288	179	175	115.052
2	WURCS=2.0/1,4,3/[a212h-1b_1-5]/1-1-1-1/a4-b1_b4-c1_c4-d1	G60650FG	52	122	48	74	41.6173		6	65	46	39	30.1164		189	238	538	321.667	188.945
3	WURCS=2.0/1,6,5/[a212h-1b_1-5]/1-1-1-1-1-1/a4-b1_b4-c1_c4-d1_d4-e1_e4-f1	G71882IJ	525	593	424	514	85.0353		9	-1	-4	1.33333	6.80686		171	257	409	279	120.516
4	WURCS=2.0/1,8,7/[a212h-1b_1-5]/1-1-1-1-1-1-1-1/a4-b1_b4-c1_c4-d1_d4-e1_e4-f1_f4-g1_g4-h1	G96903UA	988	976	1101	1021.67	68.9662		4	-3	11	4	7		203	283	1048	511.333	466.485
5	WURCS=2.0/2,4,3/[a212h-1b_1-5][a211h-1a_1-5]/1-1-2-1/a4-b1_b3-c1_b4-d1	G64102ZU	16625	13784	13067	14492	1881.7		13587	12640	13473	13233.3	516.994		142	136	141	139.667	3.21455
6	WURCS=2.0/2,7,6/[a212h-1b_1-5][a211h-1a_1-5]/1-1-1-1-2-1-1/a4-b1_b4-c1_c4-d1_d3-e1_d4-f1_f4-g1	G23128IK	8388	7852	7788	8009.33	329.493		8023	7594	7741	7786	218.011		195	44	99	112.667	76.4221
7	WURCS=2.0/2,7,6/[a212h-1b_1-5][a211h-1a_1-5]/1-1-2-1-2-1-1/a4-b1_b3-c1_b4-d1_d3-e1_d4-f1_f4-g1	G14837AV	20850	17971	18603	19141.3	1513.11		15711	15687	15643	15680.3	34.4867		287	152	130	189.667	85.0078
8	WURCS=2.0/2,7,6/[a212h-1b_1-5][a211h-1a_1-5]/1-1-2-1-1-2-1/a4-b1_b3-c1_b4-d1_d4-e1_e3-f1_e4-g1	G69043BW	16968	13886	13338	14730.7	1956.87		12652	10882	11192	11575.3	945.216		130	83	573	262	270.357
9	WURCS=2.0/2,8,7/[a212h-1b_1-5][a211h-1a_1-5]/1-1-2-1-1-1-2-1/a4-b1_b3-c1_b4-d1_d4-e1_e4-f1_f3-g1_f4-h1	G89775EO	12520	11996	10843	11786.3	857.935		11779	10853	11870	11500.7	562.738		174	76	70	106.667	58.3895
10	WURCS=2.0/2,4,3/[a212h-1b_1-5][a211h-1a_1-5]/1-1-1-2/a4-b1_b4-c1_c3-d1	G53464RS	3472	3163	2958	3197.67	258.748		3515	3559	3731	3601.67	114.146		310	60	81	150.333	138.673
11	WURCS=2.0/2,4,3/[a212h-1b_1-5][a211h-1a_1-5]/1-1-2-1/a4-b1_b2-c1_b4-d1	G10091JX	48	21	9	26	19.975		154	31	27	70.6667	72.1965		15	-10	96	33.6667	55.4106
12	WURCS=2.0/2,7,6/[a212h-1b_1-5][a211h-1a_1-5]/1-1-1-1-2-1-1/a4-b1_b4-c1_c4-d1_d2-e1_d4-f1_f4-g1	G50830OS	270	185	139	198	66.4605		401	29	16	148.667	218.624		89	172	119	126.667	42.0278
13	WURCS=2.0/2,4,3/[a212h-1b_1-5][a211h-1a_1-5]/1-1-1-2/a4-b1_b4-c1_c2-d1	G52210UI	43	32	50	41.6667	9.07377		13	8	31	17.3333	12.0968		269	239	278	262	20.4206
14	WURCS=2.0/2,7,6/[a212h-1b_1-5][a211h-1a_1-5]/1-1-1-1-1-1-2/a4-b1_b4-c1_c4-d1_d4-e1_e4-f1_f2-g1	G81390TN	612	547	742	633.667	99.2891		127	5	5	45.6667	70.4367		243	219	212	224.667	16.2583
15	WURCS=2.0/1,7,6/[a212h-1b_1-5]/1-1-1-1-1-1-1/a4-b1_b4-c1_c4-d1_d2-e1_d4-f1_f4-g1	G71309QR	35	73	37	48.3333	21.3854		17	13	37	22.3333	12.8582		156	166	241	187.667	46.4579
16	WURCS=2.0/2,5,4/[a212h-1b_1-5][a211h-1a_1-5]/1-1-2-1-1/a4-b1_b3-c1_b4-e1_c2-d1	G22073WG	29	11	17	19	9.16515		8	23	28	19.6667	10.4083		57	66	150	91	51.2933
17	WURCS=2.0/2,6,5/[a212h-1b_1-5][a211h-1a_1-5]/1-1-1-2-1-1/a4-b1_b4-c1_c3-d1_c4-f1_d2-e1	G15751DP	26	23	21	23.3333	2.51661		2	5	5	4	1.73205		110	222	24	118.667	99.2841
18	WURCS=2.0/2,5,4/[a212h-1b_1-5][a211h-1a_1-5]/1-1-2-2-1/a4-b1_b2-c1_b3-d1_b4-e1	G48347ID	0	21	12	11	10.5357		70	5	4	26.3333	37.8197		144	49	140	111	53.7308
19	WURCS=2.0/2,8,7/[a212h-1b_1-5][a211h-1a_1-5]/1-1-1-2-2-1-2-2/a4-b1_b4-c1_c3-d1_c4-f1_d3-e1_f4-g1_g3-h1	G30104OZ	1057	992	935	994.667	61.0437		358	445	1370	724.333	560.853		108	44	49	67	35.5949
20	WURCS=2.0/2,4,3/[a212h-1b_1-5][a2122A-1a_1-5_4*OC]/1-1-2-1/a4-b1_b2-c1_b4-d1	G14569KK	26	26	14	22	6.9282		5	12	57	24.6667	28.2194		160	94	23	92.3333	68.5152
21	WURCS=2.0/2,4,3/[a212h-1b_1-5][a2122A-1a_1-5]/1-1-2-1/a4-b1_b2-c1_b4-d1	G17988WV	22	5	19	15.3333	9.07377		-3	6	77	26.6667	43.8216		199	92	80	123.667	65.5159
22	WURCS=2.0/2,4,3/[a212h-1b_1-5][a2122h-1a_1-5]/1-1-2-1/a4-b1_b2-c1_b4-d1	G35558WI	6	17	5	9.33333	6.65833		12	9	24	15	7.93725		72	22	2	32	36.0555
			9	21	0	10	10.5357		14	-7	25	10.6667	16.2583		1	141	31	57.6667	73.7111
			-8	3	3	-0.666667	6.35085		5	21	7	11	8.7178		102	59	64	75	23.516
Glucans
23	WURCS=2.0/1,3,2/[a2122h-1b_1-5]/1-1-1/a4-b1_b4-c1	G14338VK	20	1	2	7.66667	10.6927		224	68	23	105	105.485		131	140	127	132.667	6.65833
24	WURCS=2.0/1,4,3/[a2122h-1b_1-5]/1-1-1-1/a4-b1_b4-c1_c4-d1	G00025MO	45	18	15	26	16.5227		172	-15	30	62.3333	97.6029		83	33	-36	26.6667	59.7523
25	WURCS=2.0/1,5,4/[a2122h-1b_1-5]/1-1-1-1-1/a4-b1_b4-c1_c4-d1_d4-e1	G91683DU	4	14	55	24.3333	27.0247		34	28	55	39	14.1774		204	32	16	84	104.231
26	WURCS=2.0/2,4,3/[a2122h-1b_1-5][a212h-1a_1-5]/1-1-1-2/a4-b1_b4-c1_b6-d1	G40879YH	-1	12	15	8.66667	8.5049		4	15	-7	4	11		61	128	20	69.6667	54.5191
27	WURCS=2.0/2,5,4/[a2122h-1b_1-5][a212h-1a_1-5]/1-1-1-1-2/a4-b1_b4-c1_c4-d1_d6-e1	G45544RX	27	7	6	13.3333	11.8462		41	70	17	42.6667	26.5393		83	-1	645	242.333	351.24
28	WURCS=2.0/2,5,4/[a2122h-1b_1-5][a212h-1a_1-5]/1-1-1-1-2/a4-b1_b4-c1_c4-d1_c6-e1	G86130MI	-3	5	24	8.66667	13.8684		14	-22	48	13.3333	35.0048		38	51	212	100.333	96.9244
29	WURCS=2.0/2,5,4/[a2122h-1b_1-5][a212h-1a_1-5]/1-1-1-1-2/a4-b1_b4-c1_b6-e1_c4-d1	G28151PW	3	10	6	6.33333	3.51188		35	26	12	24.3333	11.5902		346	276	316	312.667	35.1188
30	WURCS=2.0/2,6,5/[a2122h-1b_1-5][a212h-1a_1-5]/1-1-1-1-2-2/a4-b1_b4-c1_c4-d1_c6-f1_d6-e1	G01300FE	8	7	25	13.3333	10.116		-18	25	48	18.3333	33.5012		28	109	30	55.6667	46.1988
31	WURCS=2.0/2,6,5/[a2122h-1b_1-5][a212h-1a_1-5]/1-1-1-1-2-2/a4-b1_b4-c1_b6-f1_c4-d1_c6-e1	G71553LX	5	20	22	15.6667	9.29157		232	1	117	116.667	115.5		41	139	26	68.6667	61.3705
32	WURCS=2.0/2,7,6/[a2122h-1b_1-5][a212h-1a_1-5]/1-1-1-1-1-2-2/a4-b1_b4-c1_b6-g1_c4-d1_d4-e1_d6-f1	G73210DI	24	65	98	62.3333	37.072		45	-26	97	38.6667	61.7441		18	25	10	17.6667	7.50555
33	WURCS=2.0/2,8,7/[a2122h-1b_1-5][a212h-1a_1-5]/1-1-1-1-1-2-2-2/a4-b1_b4-c1_b6-h1_c4-d1_c6-g1_d4-e1_d6-f1	G36639LT	13	34	-5	14	19.5192		19	74	86	59.6667	35.7258		21	9	2	10.6667	9.60902
34	WURCS=2.0/2,7,6/[a2122h-1b_1-5][a212h-1a_1-5]/1-1-1-1-1-1-2/a4-b1_b4-c1_c4-d1_d4-e1_e4-f1_f6-g1	G52809MO	9	4	69	27.3333	36.1709		-37	3	1	-11	22.5389		160	65	42	89	62.554
35	WURCS=2.0/3,6,5/[a2122h-1b_1-5][a212h-1a_1-5][a2112h-1b_1-5]/1-1-1-1-2-3/a4-b1_b4-c1_c4-d1_d6-e1_e2-f1	G30237ZO	29	2	4	11.6667	15.0444		-5	6	27	9.33333	16.2583		112	60	107	93	28.688
36	WURCS=2.0/3,6,5/[a2122h-1b_1-5][a212h-1a_1-5][a2112h-1b_1-5]/1-1-1-1-2-3/a4-b1_b4-c1_c4-d1_c6-e1_e2-f1	G19836SS	22	-2	-9	3.66667	16.2583		29	-14	283	99.3333	160.506		65	35	53	51	15.0997
37	WURCS=2.0/1,3,2/[a2122h-1b_1-5]/1-1-1/a4-b1_b3-c1	G09035TO	12	14	12	12.6667	1.1547		-5	-21	229	67.6667	139.948		0	131	69	66.6667	65.5312
38	WURCS=2.0/1,4,3/[a2122h-1b_1-5]/1-1-1-1/a4-b1_b3-c1_c4-d1	G75242TK	1	13	26	13.3333	12.5033		7	-1	93	33	52.1153		38	72	9	39.6667	31.5331
39	WURCS=2.0/1,6,5/[a2122h-1b_1-5]/1-1-1-1-1-1/a3-b1_b4-c1_c4-d1_d4-e1_e3-f1	G57672GN	25	7	19	17	9.16515		-6	47	13	18	26.8514		33	5	52	30	23.6432
40	WURCS=2.0/1,6,5/[a2122h-1b_1-5]/1-1-1-1-1-1/a4-b1_b4-c1_c3-d1_d3-e1_e4-f1	G46573GP	9	4	25	12.6667	10.9697		54	92	25	57	33.6006		58	43	84	61.6667	20.7445
41	WURCS=2.0/1,6,5/[a2122h-1b_1-5]/1-1-1-1-1-1/a4-b1_b3-c1_c4-d1_d4-e1_e4-f1	G99723FZ	0	-3	-2	-1.66667	1.52753		7	44	-4	15.6667	25.1462		73	73	164	103.333	52.5389
42	WURCS=2.0/1,6,5/[a2122h-1b_1-5]/1-1-1-1-1-1/a3-b1_b4-c1_c3-d1_d4-e1_e4-f1	G59491WV	38	25	5	22.6667	16.6233		18	-2	12	9.33333	10.2632		78	17	90	61.6667	39.145
43	WURCS=2.0/1,8,7/[a2122h-1b_1-5]/1-1-1-1-1-1-1-1/a3-b1_b4-c1_c4-d1_d3-e1_e4-f1_f3-g1_g4-h1	G33033DC	-2	2	7	2.33333	4.50925		52	10	102	54.6667	46.0579		20	14	95	43	45.1331
44	WURCS=2.0/1,5,4/[a2122h-1b_1-5]/1-1-1-1-1/a3-b1_b3-c1_b6-e1_c3-d1	G19376WE	20	6	17	14.3333	7.37111		29	9	25	21	10.583		26	47	24	32.3333	12.741
45	WURCS=2.0/1,6,5/[a2122h-1b_1-5]/1-1-1-1-1-1/a6-b1_b6-c1_c6-d1_d6-e1_e6-f1	G98667GG	4	25	4	11	12.1244		67	35	-6	32	36.5923		264	16	207	162.333	129.894
46	WURCS=2.0/1,13,12/[a2122h-1b_1-5]/1-1-1-1-1-1-1-1-1-1-1-1-1/a3-b1_b3-c1_c3-d1_d3-e1_e3-f1_f3-g1_g3-h1_h3-i1_i3-j1_j3-k1_j6-m1_k3-l1	G24657BS	176	47	6	76.3333	88.7149		7	14	15	12	4.3589		154	56	38	82.6667	62.4286
Galactans
47	WURCS=2.0/1,2,1/[a2112h-1b_1-5]/1-1/a4-b1	G08806VI	7	5	51	21	26		6	16	12	11.3333	5.03322		247	119	79	148.333	87.7572
48	WURCS=2.0/1,4,3/[a2112h-1b_1-5]/1-1-1-1/a4-b1_b4-c1_c4-d1	G62513AX	51	7	5	21	26		2	5	6	4.33333	2.08167		79	62	105	82	21.6564
49	WURCS=2.0/1,6,5/[a2112h-1b_1-5]/1-1-1-1-1-1/a4-b1_b4-c1_c4-d1_d4-e1_e4-f1	G22123IT	-23	34	14	8.33333	28.9194		12	12	9	11	1.73205		102	142	78	107.333	32.3316
50	WURCS=2.0/1,4,3/[a2112h-1b_1-5]/1-1-1-1/a4-b1_b3-c1_c4-d1	G71535YZ	70	19	4	31	34.5977		-4	-5	19	3.33333	13.5769		276	156	125	185.667	79.7517
51	WURCS=2.0/2,4,3/[a2112h-1b_1-5][a211h-1a_1-5]/1-1-2-1/a4-b1_b3-c1_b4-d1	G49633QF	-5	137	28	53.3333	74.3124		6	8	7	7	1		58	39	127	74.6667	46.3069
52	WURCS=2.0/2,5,4/[a2112h-1b_1-5][a211h-1a_1-5]/1-1-1-1-2/a4-b1_b4-c1_c4-d1_d3-e1	G60984JT	13	44	36	31	16.0935		7	8	-1	4.66667	4.93288		89	99	127	105	19.6977
53	WURCS=2.0/2,5,4/[a2112h-1b_1-5][a211h-1a_1-5]/1-1-2-2-1/a4-b1_b3-c1_b4-e1_c3-d1	G35813VQ	-4	6	3	1.66667	5.1316		13	41	6	20	18.5203		129	84	959	390.667	492.705
54	WURCS=2.0/2,3,2/[a2112h-1b_1-5][a211h-1a_1-5]/1-2-2/a3-b1_b3-c1	G99405KI	-4	4	5	1.66667	4.93288		12	21	19	17.3333	4.72582		148	111	84	114.333	32.1299
55	WURCS=2.0/2,4,3/[a2112h-1b_1-5][a211h-1a_1-5]/1-2-2-2/a3-b1_b5-c1_c5-d1		25	4	9	12.6667	10.9697		5	8	28	13.6667	12.5033		89	218	119	142	67.5056
56	WURCS=2.0/1,3,2/[a2112h-1b_1-5]/1-1-1/a3-b1_b3-c1	G59103JC	13	7	10	10	3		8	84	5	32.3333	44.7698		298	74	154	175.333	113.514
57	WURCS=2.0/1,4,3/[a2112h-1b_1-5]/1-1-1-1/a3-b1_b3-c1_c3-d1	G29848AT	12	4	6	7.33333	4.16333		5	11	8	8	3		182	125	241	182.667	58.0029
58	WURCS=2.0/1,3,2/[a2112h-1b_1-5]/1-1-1/a6-b1_b6-c1	G29570QA	15	5	5	8.33333	5.7735		21	2	4	9	10.4403		48	50	298	132	143.764
59	WURCS=2.0/1,4,3/[a2112h-1b_1-5]/1-1-1-1/a3-b1_b3-c1_b6-d1	G47779ZP	9	7	9	8.33333	1.1547		27	-9	6	8	18.0831		175	78	27	93.3333	75.182
60	WURCS=2.0/1,5,4/[a2112h-1b_1-5]/1-1-1-1-1/a3-b1_b3-c1_b6-d1_d6-e1	G91585CB	130	14	9	51	68.4617		11	9	2	7.33333	4.72582		91	121	117	109.667	16.2891
61	WURCS=2.0/1,6,5/[a2112h-1b_1-5]/1-1-1-1-1-1/a3-b1_b3-c1_b6-e1_c3-d1_e6-f1	G37513LU	94	14	9	39	47.697		1	18	23	14	11.5326		693	229	94	338.667	314.198
62	WURCS=2.0/1,6,5/[a2112h-1b_1-5]/1-1-1-1-1-1/a3-b1_b3-c1_b6-d1_d6-e1_e6-f1	G34130PB	2	7	4	4.33333	2.51661		6	10	6	7.33333	2.3094		275	48	181	168	114.057
63	WURCS=2.0/2,4,3/[a2112h-1b_1-5][a211h-1a_1-5]/1-1-1-2/a3-b1_b3-c1_c3-d1	G92483ZF	7	11	13	10.3333	3.05505		5	4	-1	2.66667	3.21455		186	153	139	159.333	24.1316
64	WURCS=2.0/2,4,3/[a2112h-1b_1-5][a211h-1a_1-5]/1-1-1-2/a3-b1_b3-c1_b6-d1	G53565YZ	7	1	3	3.66667	3.05505		7	26	45	26	19		85	35	45	55	26.4575
65	WURCS=2.0/2,4,3/[a2112h-1b_1-5][a211h-1a_1-5]/1-1-2-1/a6-b1_b3-c1_b6-d1	G11128FL	9	2	7	6	3.60555		5	2	12	6.33333	5.1316		175	22	39	78.6667	83.859
66	WURCS=2.0/2,4,3/[a2112h-1b_1-5][a211h-1a_1-5]/1-1-2-1/a3-b1_b3-c1_b6-d1	G01808NH	6	5	2	4.33333	2.08167		1	5	819	275	471.122		44	36	84	54.6667	25.7164
67	WURCS=2.0/2,5,4/[a2112h-1b_1-5][a211h-1a_1-5]/1-1-1-1-2/a3-b1_b3-c1_b6-d1_d3-e1	G83478SX	8	4	-1	3.66667	4.50925		2	11	-6	2.33333	8.5049		100	618	87	268.333	302.89
68	WURCS=2.0/2,6,5/[a2112h-1b_1-5][a211h-1a_1-5]/1-1-1-1-2-1/a3-b1_b3-c1_b6-d1_d3-e1_d6-f1	G19411SY	3	5	0	2.66667	2.51661		53	164	-19	66	92.19		292	92	56	146.667	127.143
69	WURCS=2.0/2,7,6/[a2112h-1b_1-5][a211h-1a_1-5]/1-1-1-1-1-2-1/a3-b1_b3-c1_b6-d1_d6-e1_e3-f1_e6-g1	G32677AA	0	5	9	4.66667	4.50925		4	57	44	35	27.6225		60	86	167	104.333	55.8062
70	WURCS=2.0/2,4,3/[a2112h-1b_1-5][a211h-1a_1-5]/1-1-1-2/a6-b1_b6-c1_c3-d1	G06559MU	7	7	24	12.6667	9.81495		2226	424	37	895.667	1168.24		59	38	119	72	42.0357
71	WURCS=2.0/2,6,5/[a2112h-1b_1-5][a211h-1a_1-5]/1-1-1-1-1-2/a6-b1_b6-c1_c6-d1_d6-e1_e3-f1	G53028ID	7	260	14	93.6667	144.091		4	128	53	61.6667	62.4526		82	71	-10	47.6667	50.2427
72	WURCS=2.0/1,3,2/[a2112h-1b_1-5]/1-1-1/a4-b1_b4-c1	G06996VN	37	18	-3	17.3333	20.0083		114	8	5	42.3333	62.0833		314	347	168	276.333	95.2593
73	WURCS=2.0/1,4,3/[a2112h-1b_1-5]/1-1-1-1/a4-b1_b4-c1_c4-d1	G62513AX	18	-3	28	14.3333	15.8219		-4	11	3	3.33333	7.50555		352	388	465	401.667	57.7264
74	WURCS=2.0/1,5,4/[a2112h-1b_1-5]/1-1-1-1-1/a4-b1_b4-c1_c4-d1_d4-e1	G05744VA	37	44	16	32.3333	14.5717		18	28	0	15.3333	14.1892		358	380	204	314	95.8958
75	WURCS=2.0/1,6,5/[a2112h-1b_1-5]/1-1-1-1-1-1/a4-b1_b4-c1_c4-d1_d4-e1_e4-f1	G22123IT	29	108	-2	45	56.7186		10	26	24	20	8.7178		315	348	433	365.333	60.8797
76	WURCS=2.0/1,7,6/[a2112h-1b_1-5]/1-1-1-1-1-1-1/a4-b1_b4-c1_c4-d1_d4-e1_e4-f1_f4-g1	G05136IV	19	-1	46	21.3333	23.5867		12	6	4	7.33333	4.16333		336	417	437	396.667	53.4821
77	WURCS=2.0/1,7,6/[a2112h-1b_1-5]/1-1-1-1-1-1-1/a4-b1_b4-c1_c4-d1_d4-e1_d6-g1_e4-f1	G41546BT	17	14	39	23.3333	13.6504		10	10	8	9.33333	1.1547		228	228	182	212.667	26.5581
78	WURCS=2.0/1,8,7/[a2112h-1b_1-5]/1-1-1-1-1-1-1-1/a4-b1_b4-c1_c4-d1_d4-e1_d6-g1_e4-f1_g6-h1	G04227VO	14	-7	48	18.3333	27.7549		8	5	5	6	1.73205		351	417	333	367	44.2267
79	WURCS=2.0/1,8,7/[a2112h-1b_1-5]/1-1-1-1-1-1-1-1/a4-b1_b4-c1_c4-d1_d4-e1_d6-g1_e4-f1_g4-h1	G37217ZU	5	1	20	8.66667	10.0167		4	8	1	4.33333	3.51188		466	350	357	391	65.0461
80	WURCS=2.0/2,7,6/[a2112h-1b_1-5][a211h-1a_1-5]/1-1-1-1-1-1-2/a4-b1_b4-c1_c4-d1_d4-e1_d6-g1_e4-f1	G53308JF	28	0	9	12.3333	14.2945		3	6	8	5.66667	2.51661		321	461	376	386	70.5337
81	WURCS=2.0/2,8,7/[a2112h-1b_1-5][a211h-1a_1-5]/1-1-1-1-1-1-2-2/a4-b1_b4-c1_c4-d1_d4-e1_d6-g1_e4-f1_g5-h1		10	3	-1	4	5.56776		31	7	11	16.3333	12.8582		422	328	362	370.667	47.5955
82	WURCS=2.0/2,7,6/[a2112h-1b_1-5][a211h-1a_1-5]/1-1-1-1-1-1-2/a4-b1_b4-c1_c4-d1_d4-e1_e4-f1_f4-g1	G20750EO	-36	-3	-4	-14.3333	18.7705		12	8	10	10	2		536	900	320	585.333	293.13
83	WURCS=2.0/2,4,3/[a2112h-1b_1-5][a2122h-1b_1-5]/1-1-1-2/a4-b1_b4-c1_c4-d1	G28285NI	432	1	3	145.333	248.263		0	8	4	4	4		227	162	183	190.667	33.1713
84	WURCS=2.0/2,4,3/[a2112h-1b_1-5][a2112h-1b_1-5_4*OC]/1-1-1-2/a4-b1_b4-c1_c4-d1	G18996NP	10	10	3	7.66667	4.04145		2	9	5	5.33333	3.51188		491	790	458	579.667	182.9
85	WURCS=2.0/2,4,3/[a2112h-1b_1-5][a2112h-1b_1-5_4*F]/1-1-1-2/a4-b1_b4-c1_c4-d1	G58945FW	10	18	-1	9	9.53939		9	7	6	7.33333	1.52753		393	423	473	429.667	40.4145
86	WURCS=2.0/1,5,4/[a2112h-1b_1-5]/1-1-1-1-1/a3-b1_b3-c1_c3-d1_d3-e1	G53909FV	15	5	4	8	6.08276		82	-7	23	32.6667	45.2806		141	159	113	137.667	23.1805
87	WURCS=2.0/1,7,6/[a2112h-1b_1-5]/1-1-1-1-1-1-1/a3-b1_b3-c1_c3-d1_d3-e1_e3-f1_f3-g1	G97340LC	5	8	14	9	4.58258		29	12	-4	12.3333	16.5025		180	228	169	192.333	31.3741
88	WURCS=2.0/1,4,3/[a2112h-1b_1-5]/1-1-1-1/a6-b1_b6-c1_c6-d1	G94974RN	12	14	5	10.3333	4.72582		-10	352	10	117.333	203.473		217	189	556	320.667	204.285
89	WURCS=2.0/1,9,8/[a2112h-1b_1-5]/1-1-1-1-1-1-1-1-1/a3-b1_b3-c1_c3-d1_d3-e1_e3-f1_e6-h1_f3-g1_h3-i1	G28007CY	314	11	2	109	177.592		-7	-4	14	1	11.3578		165	463	504	377.333	185.025
90	WURCS=2.0/1,9,8/[a2112h-1b_1-5]/1-1-1-1-1-1-1-1-1/a3-b1_b3-c1_c3-d1_d3-e1_e3-f1_e6-h1_f3-g1_h6-i1	G19954SU	15	5	2	7.33333	6.80686		13	38	23	24.6667	12.5831		191	182	220	197.667	19.8578
91	WURCS=2.0/1,9,8/[a2112h-1b_1-5]/1-1-1-1-1-1-1-1-1/a3-b1_b3-c1_c3-d1_c6-h1_d3-e1_e3-f1_f3-g1_h3-i1	G83956ON	23	-12	1	4	17.6918		8	56	101	55	46.5081		199	91	102	130.667	59.4334
92	WURCS=2.0/2,8,7/[a2112h-1b_1-5][a211h-1a_1-5]/1-1-1-1-1-1-1-2/a3-b1_b3-c1_c3-d1_d3-e1_e3-f1_e6-h1_f3-g1	G46919JY	91	6	14	37	46.9361		371	21	77	156.333	188.004		197	117	142	152	40.9268
93	WURCS=2.0/2,3,2/[a2112h-1b_1-5][a2122A-1b_1-5]/1-1-2/a6-b1_b6-c1	G17518CK	1	-2	6	1.66667	4.04145		45	1635	27	569	923.227		277	330	210	272.333	60.136
94	WURCS=2.0/2,3,2/[a2112h-1b_1-5][a2122A-1b_1-5_4*OC]/1-1-2/a6-b1_b6-c1	G18283GP	2	5	9	5.33333	3.51188		43	43	-2	28	25.9808		204	77	204	161.667	73.3235
Other
95	WURCS=2.0/2,6,5/[a2112A-1a_1-5_6*OC][a2112A-1a_1-5]/1-2-2-2-1-1/a4-b1_b4-c1_c4-d1_d4-e1_e4-f1	G87950TF	20	30	4	18	13.1149		6	11	5	7.33333	3.21455		229	340	289	286	55.5608
96	WURCS=2.0/2,6,5/[a2112A-1a_1-5][a2112A-1a_1-5_6*OC]/1-2-2-2-1-1/a4-b1_b4-c1_c4-d1_d4-e1_e4-f1	G41087WO	2	3	5	3.33333	1.52753		8	63	3	24.6667	33.2916		383	273	491	382.333	109.002
97	WURCS=2.0/2,6,5/[a2112A-1a_1-5_6*OC][a2112A-1a_1-5]/1-2-2-2-2-1/a4-b1_b4-c1_c4-d1_d4-e1_e4-f1	G99127GZ	0	5	0	1.66667	2.88675		2	4	9	5	3.60555		162	182	223	189	31.0966
98	WURCS=2.0/2,6,5/[a2112A-1a_1-5][a2112A-1a_1-5_6*OC]/1-2-1-2-1-2/a4-b1_b4-c1_c4-d1_d4-e1_e4-f1	G01729NF	5	5	-3	2.33333	4.6188		2	3	-1	1.33333	2.08167		328	333	496	385.667	95.5842
99	WURCS=2.0/2,6,5/[a2112A-1a_1-5][a2211m-1a_1-5]/1-2-1-2-1-2/a4-b1_b2-c1_c4-d1_d2-e1_e4-f1	G43211JR	-5	-6	-1	-4	2.64575		68	6	10	28	34.6987		134	165	161	153.333	16.8622
100	WURCS=2.0/1,6,5/[a1122h-1b_1-5]/1-1-1-1-1-1/a6-b1_b6-c1_c6-d1_d6-e1_e6-f1	G43482XA	50	6	3	19.6667	26.3122		10	5	6	7	2.64575		138	73	39	83.3333	50.3024
101	WURCS=2.0/2,8,7/[a1122h-1b_1-5][a211h-1a_1-5]/1-1-1-1-1-1-2-2/a6-b1_b6-c1_c6-d1_d6-e1_e6-f1_f6-g1_g5-h1		46	-1	0	15	26.8514		1	-3	22	6.66667	13.4288		77	52	0	43	39.281
102	WURCS=2.0/1,6,5/[a1122h-1b_1-5]/1-1-1-1-1-1/a6-b1_b2-c1_c2-d1_d6-e1_e2-f1	G45716PI	35	280	1297	537.333	669.198		1	-1	6	2	3.60555		20	100	39	53	41.7971
103	WURCS=2.0/1,6,5/[a1122h-1b_1-5]/1-1-1-1-1-1/a6-b1_b2-c1_b6-d1_d2-e1_d6-f1	G37046TM	990	929	153	690.667	466.631		4	3	2	3	1		28	161	81	90	66.9552
104	WURCS=2.0/1,6,5/[a2122h-1b_1-5_2*NCC/3=O]/1-1-1-1-1-1/a4-b1_b4-c1_c4-d1_d4-e1_e4-f1	G36414FS	70	10	3	27.6667	36.8284		108	275	143	175.333	88.07		71	120	1128	439.667	596.617
0
xylans
1
2
3
4
5
6
7
8
9
10
11
12
13
14
15
16
17
18
19
20
21
22
0
0
Glucans
23
24
25
26
27
28
29
30
31
32
33
34
35
36
37
38
39
40
41
42
43
44
45
46
Galactans
47
48
49
50
51
52
53
54
55
56
57
58
59
60
61
62
63
64
65
66
67
68
69
70
71
72
73
74
75
76
77
78
79
80
81
82
83
84
85
86
87
88
89
90
91
92
93
94
Other
95
96
97
98
99
100
101
102
103
104
Polysaccharides
105
106
107
108
109
110
111
112
113
114
Azides
Az10
Az100
Az200
Az400
Controls
IgG
IgM
75
49
0
xylans
1
2
3
4
5
6
7
8
9
10
11
12
13
14
15
16
17
18
19
20
21
22
0
0
Glucans
23
24
25
26
27
28
29
30
31
32
33
34
35
36
37
38
39
40
41
42
43
44
45
46
Galactans
47
48
49
50
51
52
53
54
55
56
57
58
59
60
61
62
63
64
65
66
67
68
69
70
71
72
73
74
75
76
77
78
79
80
81
82
83
84
85
86
87
88
89
90
91
92
93
94
Other
95
96
97
98
99
100
101
102
103
104
Polysaccharides
105
106
107
108
109
110
111
112
113
114
Azides
Az10
Az100
Az200
Az400
Controls
IgG
IgM
75
49
0
xylans
1
2
3
4
5
6
7
8
9
10
11
12
13
14
15
16
17
18
19
20
21
22
0
0
Glucans
23
24
25
26
27
28
29
30
31
32
33
34
35
36
37
38
39
40
41
42
43
44
45
46
Galactans
47
48
49
50
51
52
53
54
55
56
57
58
59
60
61
62
63
64
65
66
67
68
69
70
71
72
73
74
75
76
77
78
79
80
81
82
83
84
85
86
87
88
89
90
91
92
93
94
Other
95
96
97
98
99
100
101
102
103
104
Polysaccharides
105
106
107
108
109
110
111
112
113
114
Azides
Az10
Az100
Az200
Az400
Controls
IgG
IgM
75
49
0
xylans
1
2
3
4
5
6
7
8
9
10
11
12
13
14
15
16
17
18
19
20
21
22
0
0
Glucans
23
24
25
26
27
28
29
30
31
32
33
34
35
36
37
38
39
40
41
42
43
44
45
46
Galactans
47
48
49
50
51
52
53
54
55
56
57
58
59
60
61
62
63
64
65
66
67
68
69
70
71
72
73
74
75
76
77
78
79
80
81
82
83
84
85
86
87
88
89
90
91
92
93
94
Other
95
96
97
98
99
100
101
102
103
104
Polysaccharides
105
106
107
108
109
110
111
112
113
114
Azides
Az10
Az100
Az200
Az400
Controls
IgG
IgM
75
49
0
xylans
1
2
3
4
5
6
7
8
9
10
11
12
13
14
15
16
17
18
19
20
21
22
0
0
Glucans
23
24
25
26
27
28
29
30
31
32
33
34
35
36
37
38
39
40
41
42
43
44
45
46
Galactans
47
48
49
50
51
52
53
54
55
56
57
58
59
60
61
62
63
64
65
66
67
68
69
70
71
72
73
74
75
76
77
78
79
80
81
82
83
84
85
86
87
88
89
90
91
92
93
94
Other
95
96
97
98
99
100
101
102
103
104
Polysaccharides
105
106
107
108
109
110
111
112
113
114
Azides
Az10
Az100
Az200
Az400
Controls
IgG
IgM
75
49
0
xylans
1
2
3
4
5
6
7
8
9
10
11
12
13
14
15
16
17
18
19
20
21
22
0
0
Glucans
23
24
25
26
27
28
29
30
31
32
33
34
35
36
37
38
39
40
41
42
43
44
45
46
Galactans
47
48
49
50
51
52
53
54
55
56
57
58
59
60
61
62
63
64
65
66
67
68
69
70
71
72
73
74
75
76
77
78
79
80
81
82
83
84
85
86
87
88
89
90
91
92
93
94
Other
95
96
97
98
99
100
101
102
103
104
Polysaccharides
105
106
107
108
109
110
111
112
113
114
Azides
Az10
Az100
Az200
Az400
Controls
IgG
IgM
75
49
0
xylans
1
2
3
4
5
6
7
8
9
10
11
12
13
14
15
16
17
18
19
20
21
22
0
0
Glucans
23
24
25
26
27
28
29
30
31
32
33
34
35
36
37
38
39
40
41
42
43
44
45
46
Galactans
47
48
49
50
51
52
53
54
55
56
57
58
59
60
61
62
63
64
65
66
67
68
69
70
71
72
73
74
75
76
77
78
79
80
81
82
83
84
85
86
87
88
89
90
91
92
93
94
Other
95
96
97
98
99
100
101
102
103
104
Polysaccharides
105
106
107
108
109
110
111
112
113
114
Azides
Az10
Az100
Az200
Az400
Controls
IgG
IgM
75
49
0
xylans
1
2
3
4
5
6
7
8
9
10
11
12
13
14
15
16
17
18
19
20
21
22
0
0
Glucans
23
24
25
26
27
28
29
30
31
32
33
34
35
36
37
38
39
40
41
42
43
44
45
46
Galactans
47
48
49
50
51
52
53
54
55
56
57
58
59
60
61
62
63
64
65
66
67
68
69
70
71
72
73
74
75
76
77
78
79
80
81
82
83
84
85
86
87
88
89
90
91
92
93
94
Other
95
96
97
98
99
100
101
102
103
104
Polysaccharides
105
106
107
108
109
110
111
112
113
114
Azides
Az10
Az100
Az200
Az400
Controls
IgG
IgM
75
49
0
xylans
1
2
3
4
5
6
7
8
9
10
11
12
13
14
15
16
17
18
19
20
21
22
0
0
Glucans
23
24
25
26
27
28
29
30
31
32
33
34
35
36
37
38
39
40
41
42
43
44
45
46
Galactans
47
48
49
50
51
52
53
54
55
56
57
58
59
60
61
62
63
64
65
66
67
68
69
70
71
72
73
74
75
76
77
78
79
80
81
82
83
84
85
86
87
88
89
90
91
92
93
94
Other
95
96
97
98
99
100
101
102
103
104
Polysaccharides
105
106
107
108
109
110
111
112
113
114
Azides
Az10
Az100
Az200
Az400
Controls
IgG
IgM
75
49
0
xylans
1
2
3
4
5
6
7
8
9
10
11
12
13
14
15
16
17
18
19
20
21
22
0
0
Glucans
23
24
25
26
27
28
29
30
31
32
33
34
35
36
37
38
39
40
41
42
43
44
45
46
Galactans
47
48
49
50
51
52
53
54
55
56
57
58
59
60
61
62
63
64
65
66
67
68
69
70
71
72
73
74
75
76
77
78
79
80
81
82
83
84
85
86
87
88
89
90
91
92
93
94
Other
95
96
97
98
99
100
101
102
103
104
Polysaccharides
105
106
107
108
109
110
111
112
113
114
Azides
Az10
Az100
Az200
Az400
Controls
IgG
IgM
75
49
0
xylans
1
2
3
4
5
6
7
8
9
10
11
12
13
14
15
16
17
18
19
20
21
22
0
0
Glucans
23
24
25
26
27
28
29
30
31
32
33
34
35
36
37
38
39
40
41
42
43
44
45
46
Galactans
47
48
49
50
51
52
53
54
55
56
57
58
59
60
61
62
63
64
65
66
67
68
69
70
71
72
73
74
75
76
77
78
79
80
81
82
83
84
85
86
87
88
89
90
91
92
93
94
Other
95
96
97
98
99
100
101
102
103
104
Polysaccharides
105
106
107
108
109
110
111
112
113
114
Azides
Az10
Az100
Az200
Az400
Controls
IgG
IgM
75
49
0
xylans
1
2
3
4
5
6
7
8
9
10
11
12
13
14
15
16
17
18
19
20
21
22
0
0
Glucans
23
24
25
26
27
28
29
30
31
32
33
34
35
36
37
38
39
40
41
42
43
44
45
46
Galactans
47
48
49
50
51
52
53
54
55
56
57
58
59
60
61
62
63
64
65
66
67
68
69
70
71
72
73
74
75
76
77
78
79
80
81
82
83
84
85
86
87
88
89
90
91
92
93
94
Other
95
96
97
98
99
100
101
102
103
104
Polysaccharides
105
106
107
108
109
110
111
112
113
114
Azides
Az10
Az100
Az200
Az400
Controls
IgG
IgM
75
49
0
xylans
1
2
3
4
5
6
7
8
9
10
11
12
13
14
15
16
17
18
19
20
21
22
0
0
Glucans
23
24
25
26
27
28
29
30
31
32
33
34
35
36
37
38
39
40
41
42
43
44
45
46
Galactans
47
48
49
50
51
52
53
54
55
56
57
58
59
60
61
62
63
64
65
66
67
68
69
70
71
72
73
74
75
76
77
78
79
80
81
82
83
84
85
86
87
88
89
90
91
92
93
94
Other
95
96
97
98
99
100
101
102
103
104
Polysaccharides
105
106
107
108
109
110
111
112
113
114
Azides
Az10
Az100
Az200
Az400
Controls
IgG
IgM
75
49
0
xylans
1
2
3
4
5
6
7
8
9
10
11
12
13
14
15
16
17
18
19
20
21
22
0
0
Glucans
23
24
25
26
27
28
29
30
31
32
33
34
35
36
37
38
39
40
41
42
43
44
45
46
Galactans
47
48
49
50
51
52
53
54
55
56
57
58
59
60
61
62
63
64
65
66
67
68
69
70
71
72
73
74
75
76
77
78
79
80
81
82
83
84
85
86
87
88
89
90
91
92
93
94
Other
95
96
97
98
99
100
101
102
103
104
Polysaccharides
105
106
107
108
109
110
111
112
113
114
Azides
Az10
Az100
Az200
Az400
Controls
IgG
IgM
75
49
0
xylans
1
2
3
4
5
6
7
8
9
10
11
12
13
14
15
16
17
18
19
20
21
22
0
0
Glucans
23
24
25
26
27
28
29
30
31
32
33
34
35
[truncated: 92 more rows]
